# Supplementary material for: Precursor gene engineering expands the loop region of the lasso peptide microcin J25
Source: Royal Society of Chemistry journal article supplement (doi:10.1039/d6cb00126b), 2026-06-02
Supplement: d6cb00126b1.pdf [file d6cb00126b1.pdf]

Supporting Information

## **Precursor Gene Engineering Expands the Loop Region of the Lasso Peptide Microcin J25**

Hui-Ni Tan<sup>1</sup>, Julian D. Hegemann<sup>23</sup>, Manuel Maestre-Reyna<sup>14</sup>, John Chu<sup>15\*</sup>

<sup>1</sup>Department of Chemistry, National Taiwan University, Taipei 106319, Taiwan. <sup>2</sup>Institute of Pharmaceutical Biology, Technische Universität Braunschweig, Braunschweig, Germany. <sup>3</sup>Center of Pharmaceutical Engineering (PVZ), Technische Universität Braunschweig, Braunschweig, Germany. <sup>4</sup>Institute of Biological Chemistry, Academia Sinica, Taipei 115024, Taiwan. <sup>5</sup>Center for Emerging Material and Advanced Devices, National Taiwan University, Taipei 106319, Taiwan.

\*Correspondence: [johnchu@ntu.edu.tw](mailto:johnchu@ntu.edu.tw)

## Table of Contents

---

### Materials and Methods

---

|                                                           |   |
|-----------------------------------------------------------|---|
| Reagents, media, and strains                              | 2 |
| MccJ25 production                                         | 2 |
| Confirmation by MALDI-MS and Quantification by HPLC       | 2 |
| Lasso topology determination by mass spectrometry (MS)    | 3 |
| Growth inhibition zone assay                              | 3 |
| MccJ25 structure prediction and cavity volume calculation | 4 |

---

### Supplementary Figures

---

|                                                                                                                                                                    |    |
|--------------------------------------------------------------------------------------------------------------------------------------------------------------------|----|
| <b>Figure S1.</b> The HPLC analysis and MS confirmation of wild-type MccJ25                                                                                        | 5  |
| <b>Figure S2.</b> The HPLC analysis and MS confirmation of MccJ25 <sup>R</sup> A <sub>1</sub> variant                                                              | 6  |
| <b>Figure S3.</b> The HPLC analysis and MS confirmation of MccJ25 <sup>T</sup> G <sub>1</sub> variant                                                              | 7  |
| <b>Figure S4.</b> The HPLC analysis and MS confirmation of MccJ25 <sup>L</sup> A <sub>1</sub> variant                                                              | 8  |
| <b>Figure S5.</b> The HPLC analysis and MS confirmation of MccJ25 <sup>L</sup> A <sub>3</sub> variant                                                              | 9  |
| <b>Figure S6.</b> The HPLC analysis and MS confirmation of MccJ25 <sup>L</sup> A <sub>5</sub> variant                                                              | 10 |
| <b>Figure S7.</b> The HPLC analysis and MS confirmation of MccJ25 <sup>L</sup> A <sub>7</sub> variant                                                              | 11 |
| <b>Figure S8.</b> The HPLC analysis and MS confirmation of MccJ25 <sup>L</sup> A <sub>10</sub> variant                                                             | 12 |
| <b>Figure S9.</b> The HPLC analysis and MS confirmation of MccJ25 <sup>L</sup> G <sub>10</sub> variant                                                             | 13 |
| <b>Figure S10.</b> The HPLC analysis and MS confirmation of MccJ25 <sup>L</sup> G <sub>15</sub> variant                                                            | 14 |
| <b>Figure S11.</b> The HPLC analysis and MS confirmation of MccJ25 <sup>L</sup> A <sub>1</sub> A <sub>1</sub> variant                                              | 15 |
| <b>Figure S12.</b> The HPLC analysis and MS confirmation of MccJ25 <sup>L</sup> ARA variant                                                                        | 16 |
| <b>Figure S13.</b> The HPLC analysis and MS confirmation of MccJ25 <sup>L</sup> SARAE variant                                                                      | 17 |
| <b>Figure S14.</b> The HPLC analysis and MS confirmation of MccJ25 <sup>L</sup> G <sub>2</sub> S <sub>2</sub> G <sub>2</sub> S <sub>2</sub> G <sub>2</sub> variant | 18 |
| <b>Figure S15.</b> Lasso structure prediction for all MccJ25 variants                                                                                              | 19 |

---

### Supplementary Tables

---

|                                                                                      |    |
|--------------------------------------------------------------------------------------|----|
| <b>Table S1.</b> DNA primers used in this study                                      | 21 |
| <b>Table S2.</b> Fragmentation series of MccJ25 <sup>L</sup> G <sub>15</sub> variant | 22 |

---

|                   |    |
|-------------------|----|
| <b>References</b> | 25 |
|-------------------|----|

---

## **MATERIALS and METHODS**

### ***Reagents, Media, and Strains***

All microcin J25 (MccJ25) variants described herein were derived from the wild-type (WT) biosynthetic gene cluster (BGC) in the pTUC202 plasmid.<sup>[1]</sup> The MccJ25 BGC encodes four genes, *mcjA*, *mcjB*, *mcjC*, and *mcjD*. DNA primers for cloning and sequencing were purchased from Genomics BioSci & Technology Company (Taiwan) and are listed in Table S1. Reagents and kits for site-directed mutagenesis (E0554) were purchased from New England Biolabs (USA). Other reagents were purchased from BioShop Canada Inc. (Canada). Constructs described herein have all been verified by Sanger sequencing by Genomics BioSci & Technology Company (Taiwan). Cloning was carried out in *Escherichia coli* DH5 $\alpha$  grown in Luria-Bertani (LB) medium supplemented with chloramphenicol (25  $\mu$ g/mL). MccJ25 production was performed in *E. coli* BL21(DE3) grown in M9 medium supplemented with chloramphenicol (25  $\mu$ g/mL).

### ***MccJ25 Production***

Procedure for MccJ25 production is based on a previous publication<sup>[2]</sup> and slightly modified as follows. A single *E. coli* BL21(DE3) colony harboring pTUC202 with the WT or engineered MccJ25 BGC was inoculated into LB medium (3 mL) supplemented with chloramphenicol (25  $\mu$ g/mL) and grown at 37 °C overnight. This starter culture was diluted to OD<sub>600</sub> 0.1 in M9 medium (50 mL) supplemented with chloramphenicol (25  $\mu$ g/mL) and grown at 37 °C for 4 days. On day 5 the cells were removed by centrifugation; 8 mL of the supernatant was extracted with 1 volume of 1-butanol and the organic layer was collected and dried under reduced pressure. The crude extract was redissolved in H<sub>2</sub>O (1 mL) and immediately subjected to HPLC analysis for quantification, mass spectrometry (MS) analysis for structure determination, and growth inhibition zone assay for antibacterial activity evaluation. All MccJ25 variants were carried out in the same way (*Figure S1 – S14*).

### ***Confirmation by MALDI-MS and Quantification by HPLC***

As described in our previous publication,<sup>[3]</sup> HPLC analysis was performed on a Waters Instrument (996 UV detector, 600 pump and controller) equipped with an analytical Thermo Scientific™ C18 column (Hypersil GOLD™, 250 x 4.6 mm, 175 Å, 5  $\mu$ m) using a two-solvent system. Water and acetonitrile supplemented with 0.1% (v/v) formic acid were used as the mobile phase, designated as solvent A and B, respectively. The following program was used: 0 – 5 min (10%B, isocratic), 5 – 25 min (10 to 50%B, linear gradient), 25 – 26 min (50 to 90%B, linear

gradient), 26 – 30 min (90%B, isocratic). The flow rate was fixed at 1 mL/min and the absorbance at 210-450 nm was recorded. MccJ25 variants typically eluted between 22-27 min; the peak for every variant was collected and confirmed by MALDI-TOF MS (microTOF-QII, Bruker).

Based on the following procedure, biological triplicates ( $n = 3$ ) were performed for every MccJ25 variant to quantitate the production yield and reported as the average  $\pm$  standard deviation in the main text (Table 1):

- 1) Calculate the extinction coefficient ( $\epsilon$ ) of each MccJ25 variant at 214 nm using the *BeStSel Extinction Coefficient Calculation* (<https://bestsel.elte.hu/extcoeff.php>), which is one of many servers that are freely available for this purpose.
- 2) Obtain the 8 mL crude extract of a MccJ25 variant from 50 mL of culture based on the *MccJ25 Production* procedure described above.
- 3) Dissolve the crude extract in 1 mL of water.
- 4) Mix 95  $\mu$ L the solution with 5  $\mu$ L of caffeine (2 mg/mL) and co-inject into HPLC.
- 5) The peak that corresponds to the MccJ25 variant (confirmed by MALDI-MS) at 214 nm was integrated and compared to that of the internal standard (100  $\mu$ g/mL of caffeine in every injection).
- 6) Production yield of variant  $X$  was estimated based on the equation below:

$$\text{Yield}_X = \frac{\text{Peak}_X}{\text{Peak}_{\text{Caffeine in } X}} \times \left( \frac{\text{Peak}_{\text{Caffeine in MccJ25}}}{\text{Peak}_{\text{MccJ25}}} \right) \times \frac{\epsilon_{\text{MccJ25}}}{\epsilon_X} \times \overline{\text{Yield}}_{\text{MccJ25}}$$

### ***Lasso Topology Determination by MS***

Topology determination was performed by incubating MccJ25 variant crude extracts (26  $\mu$ L) with 40  $\mu$ g/mL of thermolysin in 0.14 M  $\text{NH}_4\text{HCO}_3$  buffer at pH 8.0 (100  $\mu$ L in total) under 46°C for 1 to 5 h. Reaction was quenched by adding 25  $\mu$ L of acetic acid and the resulting peptide mixtures were subjected to MALDI-TOF MS (microTOF-QII, Bruker) analysis. The presence of a string trapped within the ring is indicative of the lasso topology prior to thermolysin digestion (*Figure S1 – S14*).

### ***Growth Inhibition Zone Assay***

A single colony of *E. coli* MG1655 was inoculated into LB medium (3 mL) and grown at 37 °C overnight. The culture was then diluted 100-fold into 10 mL of molten M9 agar and poured into a

petri dish and left to solidify. Crude extracts obtained from 100 mL of MccJ25 production culture were resuspended in 1 mL of H<sub>2</sub>O. Once the M9/agar mixture solidified, 1, 5, 10, 20, and 30  $\mu$ L of the crude extracts of MccJ25 variants were spotted onto the surface. The petri dishes were then incubated at 37°C for 16 h. The antibacterial activity of each variant was quantitated based on the equation below and reported as a score relative to that of WT MccJ25 (Table 1):

$$\text{score} = \frac{d^2}{\text{volume} \times \text{yield}}$$

### ***McjC Structure Prediction and Cavity Volume Calculation***

The AlphaFold Server<sup>[4-5]</sup> was used for protein structure prediction. We first predicted the structures of McjB and McjC individually, and then the McjA/McjB/McjC ternary complex structure prediction was carried out by submitting three protein sequences simultaneously. The predicted protein complex structures were rendered using the PyMOL Molecular Graphics System, v.3.1 (Schrödinger LLC, USA).

The cavity of McjC was calculated by using the CASTpFold (Computed Atlas of Surface Itopography of the universe of protein Folds) analysis server.<sup>[6-7]</sup> The predicted McjC structure was submitted into the server in pdb format, and the probe radius was set as the approximate size of water molecules ( $r = 1.4 \text{ \AA}$ ). The measurement was also visualized by using the PyMOL Molecular Graphics System with CASTpFold pocket loader plugin.

## SUPPLEMENTARY FIGURES

### Figure S1. The HPLC analysis and MS confirmation of wild-type MccJ25

Wild-type MccJ25. **a)** Crude extract was analyzed by HPLC with MccJ25 eluted at  $t_R = 26.2$  min.

**b)** The peak presumed to be MccJ25 was collected and confirmed by MALDI-TOF MS with the observed  $m/z$  2129.103 and 2145.095 as the sodium and potassium adduct  $[M+Na]^+$  and  $[M+K]^+$ , respectively.

**c)** Thermolysin digestion with single cleavage as the result lead to the hydrolysis of MccJ25, with the observed  $m/z$  2147.307 and 2163.300 as the sodium and potassium adduct  $[M+H_2O+Na]^+$  and  $[M+H_2O+K]^+$ , respectively.

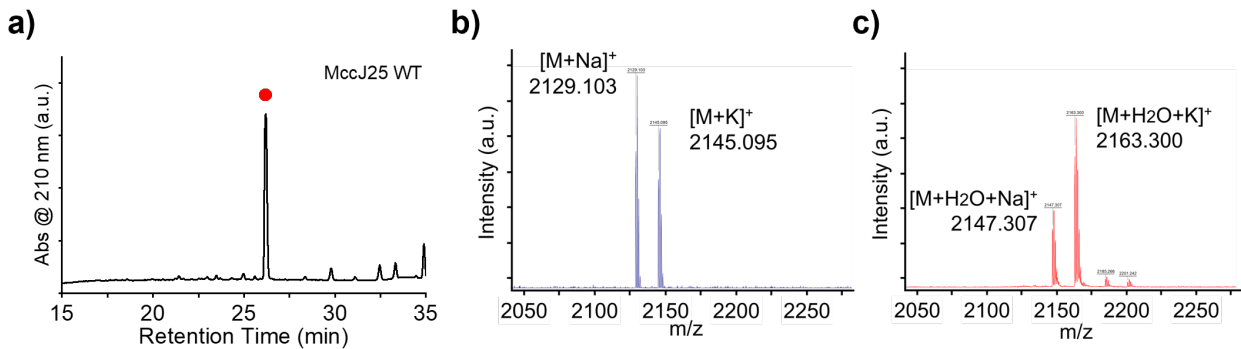

**Figure S2.** The HPLC analysis and MS confirmation of MccJ25 <sup>R</sup>A<sub>1</sub> variant

MccJ25 <sup>R</sup>A<sub>1</sub> variant. **a)** Crude extract was analyzed by HPLC with <sup>R</sup>A<sub>1</sub> variant eluted at  $t_R = 26.2$  min. **b)** The peak presumed to be <sup>R</sup>A<sub>1</sub> variant was collected and confirmed by MALDI-TOF MS with the observed  $m/z$  2178.116 and 2202.071 as the hydrogen and potassium adduct  $[M+H]^+$  and  $[M+K]^+$ , respectively. **c)** Thermolysin digestion of <sup>R</sup>A<sub>1</sub> variant result in only partial peptide  $m/z$  being observed, with 1108.806 as sodium adduct  $[\text{Ring}+\text{YF}+\text{Na}]^+$  and 1280.069 as potassium adduct  $[\text{Ring}+\text{YFVG}+\text{K}]^+$ , indicated <sup>R</sup>A<sub>1</sub> variant as a branched-cyclic peptide as the loop region of peptide was not mechanically locked within the ring region.

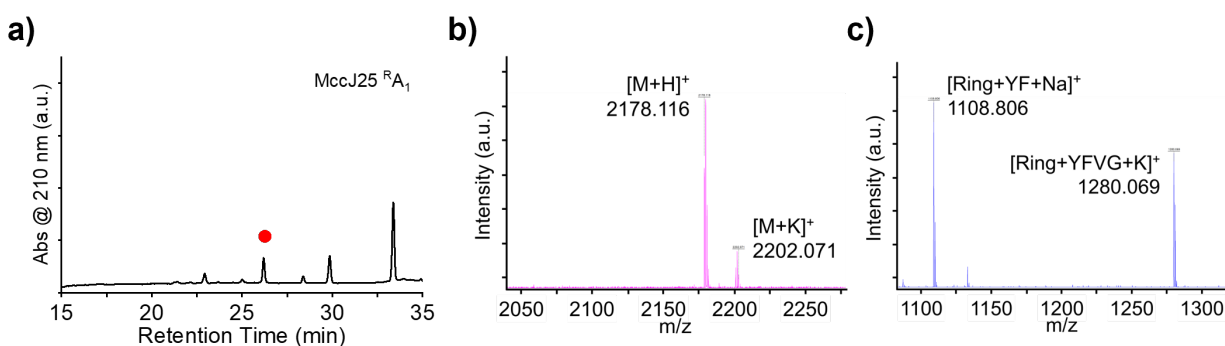

**Figure S3.** The HPLC analysis and MS confirmation of MccJ25  $\text{T}_{\text{G}_1}$  variant.

MccJ25  $\text{T}_{\text{G}_1}$  variant. **a)** Crude extract was analyzed by HPLC with  $\text{T}_{\text{G}_1}$  variant eluted at  $t_R = 25.8$  min. **b)** The peak presumed to be  $\text{T}_{\text{G}_1}$  variant was collected and confirmed by MALDI-TOF MS with the observed  $m/z$  2186.792 and 2202.888 as the sodium and potassium adduct  $[\text{M}+\text{Na}]^+$  and  $[\text{M}+\text{K}]^+$ , respectively. The lasso topology of this variant was confirmed in a previous publication.<sup>[8]</sup>

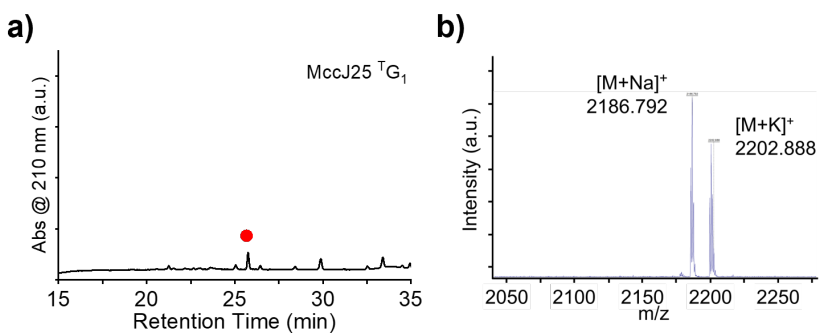

**Figure S4.** The HPLC analysis and MS confirmation of MccJ25 <sup>L</sup>A<sub>1</sub> variant.

MccJ25 <sup>L</sup>A<sub>1</sub> variant. **a)** Crude extract was analyzed by HPLC with <sup>L</sup>A<sub>1</sub> variant eluted at  $t_R = 26.3$  min. **b)** The peak presumed to be <sup>L</sup>A<sub>1</sub> variant was collected and confirmed by MALDI-TOF MS with the observed  $m/z$  2200.379 and 2216.406 as the sodium and potassium adduct  $[M+Na]^+$  and  $[M+K]^+$ , respectively. **c)** Thermolysin digestion with single cleavage as the result lead to the hydrolysis of <sup>L</sup>A<sub>1</sub> variant, with the observed  $m/z$  2218.223 and 2234.200 as the sodium and potassium adduct  $[M+H_2O+Na]^+$  and  $[M+H_2O+K]^+$ , respectively.

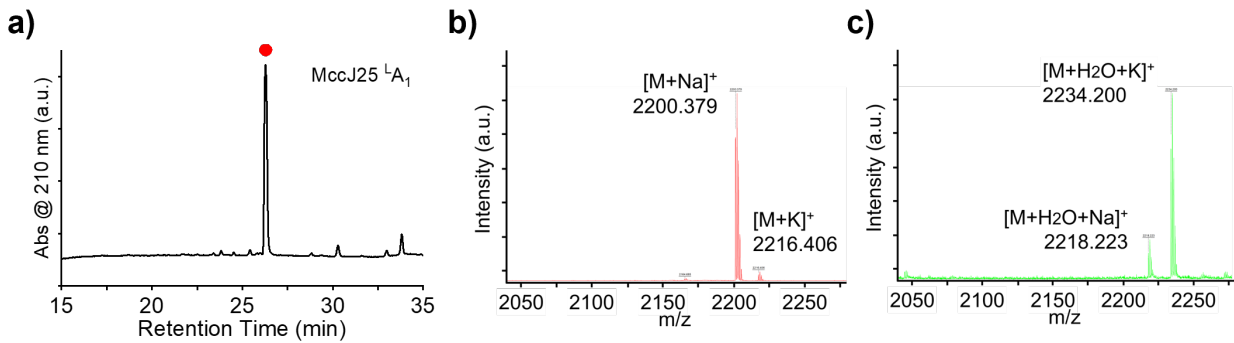

**Figure S5.** The HPLC analysis and MS confirmation of MccJ25 <sup>L</sup>A<sub>3</sub> variant

MccJ25 <sup>L</sup>A<sub>3</sub> variant. **a)** Crude extract was analyzed by HPLC with <sup>L</sup>A<sub>3</sub> variant eluted at  $t_R = 26.8$  min. **b)** The peak presumed to be <sup>L</sup>A<sub>3</sub> variant was collected and confirmed by MALDI-TOF MS with the observed  $m/z$  2342.916 as the sodium adduct  $[M+Na]^+$ . **c)** Thermolysin digestion led to the loss of a pentapeptide fragment “VGAAA”, resulting in a supramolecular complex, also known as a [2]rotaxane  $[(GGAHGVPEYF) \cdot (IGTPISFYG)]$ , with the observed  $m/z$  1991.392 as the sodium adduct  $[M-VGAAA+H_2O+Na]^+$ .

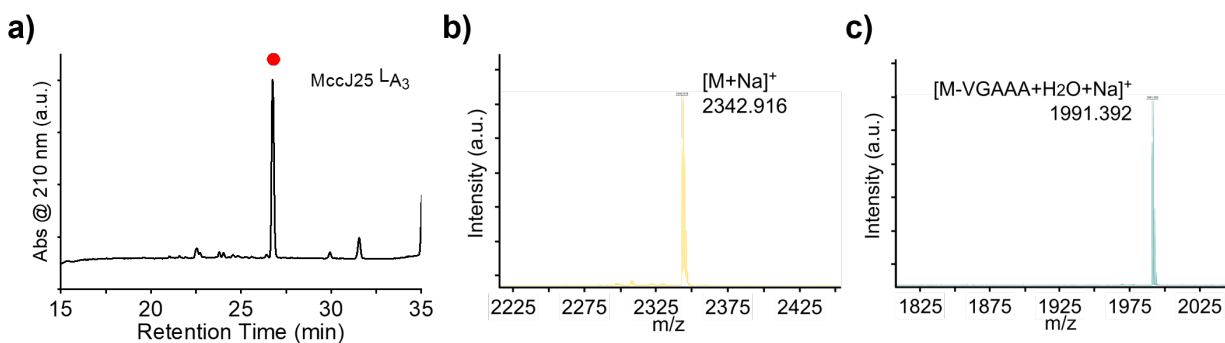

**Figure S6.** The HPLC analysis and MS confirmation of MccJ25 <sup>L</sup>A<sub>5</sub> variant

MccJ25 <sup>L</sup>A<sub>5</sub> variant. **a)** Crude extract was analyzed by HPLC with <sup>L</sup>A<sub>5</sub> variant eluted at  $t_R = 25.7$  min. **b)** The peak presumed to be <sup>L</sup>A<sub>5</sub> variant was collected and confirmed by MALDI-TOF MS with the observed  $m/z$  2484.254 and 2500.317 as the sodium and potassium adduct  $[M+Na]^+$  and  $[M+K]^+$ , respectively. **c)** Thermolysin digestion led to the loss of a heptapeptide fragment “VGAAAA”, resulting in a supramolecular complex, also known as a [2]rotaxane  $[(GGAHGVPEYF) \cdot (IGTPISFYG)]$ , with the observed  $m/z$  1991.293 and 2007.292 as the sodium and potassium adduct  $[M-VGA_5+H_2O+Na]^+$  and  $[M-VGA_5+H_2O+K]^+$ , respectively.

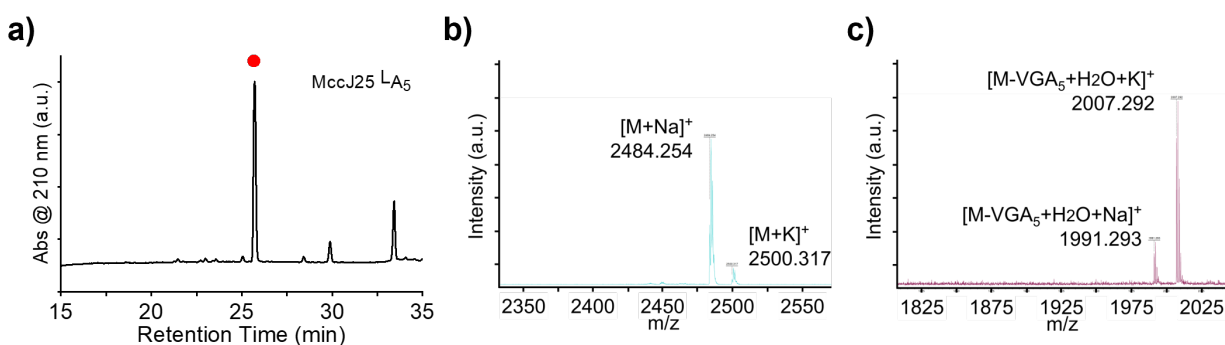

**Figure S7.** The HPLC analysis and MS confirmation of MccJ25 <sup>L</sup>A<sub>7</sub> variant

MccJ25 <sup>L</sup>A<sub>7</sub> variant. **a)** Crude extract was analyzed by HPLC with <sup>L</sup>A<sub>7</sub> variant eluted at  $t_R = 26.0$  min. **b)** The peak presumed to be <sup>L</sup>A<sub>7</sub> variant was collected and confirmed by MALDI-TOF MS with the observed  $m/z$  2626.830 and 2642.882 as the sodium and potassium adduct  $[M+Na]^+$  and  $[M+K]^+$ , respectively. **c)** Thermolysin digestion led to the loss of a nonapeptide fragment “VGAAAAAAA”, resulting in a supramolecular complex, also known as a [2]rotaxane  $[(GGAHGVPEYF) \cdot (IGTPISFYG)]$ , with the observed  $m/z$  1991.292 and 2007.259 as the sodium and potassium adduct  $[M-VGA_7+H_2O+Na]^+$  and  $[M-VGA_7+H_2O+K]^+$ , respectively.

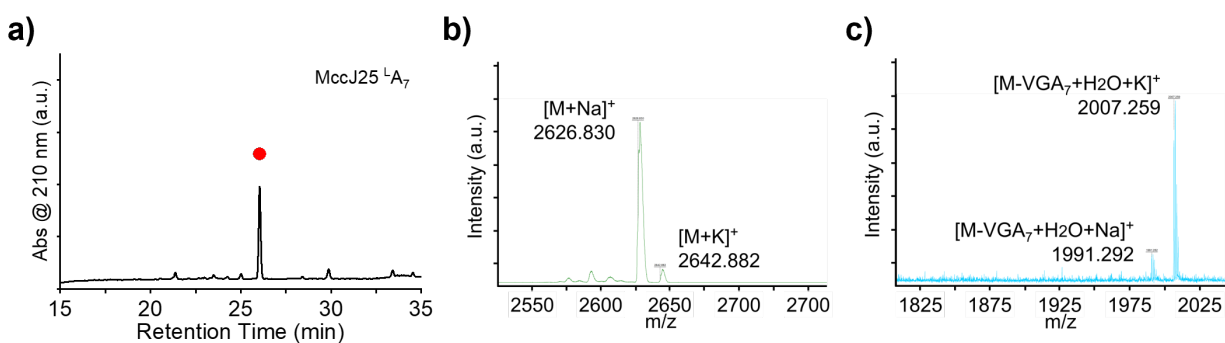

**Figure S8.** The HPLC analysis and MS confirmation of MccJ25 <sup>L</sup>A<sub>10</sub> variant

MccJ25 <sup>L</sup>A<sub>10</sub> variant. **a)** Crude extract was analyzed by HPLC with <sup>L</sup>A<sub>10</sub> variant eluted at  $t_R = 26.4$  min. **b)** The peak presumed to be <sup>L</sup>A<sub>10</sub> variant was collected and confirmed by MALDI-TOF MS with the observed  $m/z$  2839.305 and 2855.306 as the sodium and potassium adduct  $[M+Na]^+$  and  $[M+K]^+$ , respectively. **c)** Thermolysin digestion led to the loss of an octapeptide fragment “VGAAAAA”, resulting in a supramolecular complex, also known as a [2]rotaxane  $[(GGAHGVPEYF) \cdot (IGTPISFYG)]$ , with the observed  $m/z$  2275.170 and 2292.923 as the sodium and potassium adduct  $[M-VGA_6+H_2O+Na]^+$  and  $[M-VGA_6+H_2O+K]^+$ , respectively.

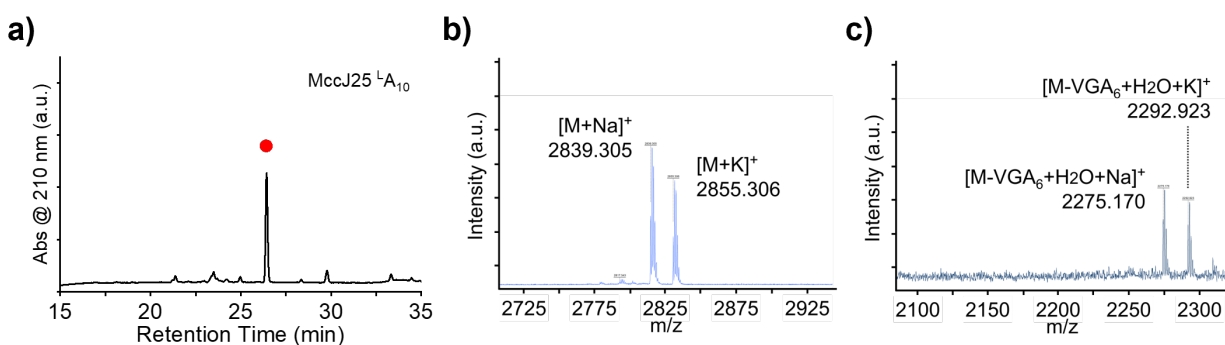

**Figure S9.** The HPLC analysis and MS confirmation of MccJ25 <sup>L</sup>G<sub>10</sub> variant

MccJ25 <sup>L</sup>G<sub>10</sub> variant. **a)** Crude extract was analyzed by HPLC with <sup>L</sup>G<sub>10</sub> variant eluted at  $t_R = 23.3$  min. **b)** The peak presumed to be <sup>L</sup>G<sub>10</sub> variant was collected and confirmed by MALDI-TOF MS with the observed  $m/z$  2699.992 and 2715.974 as the sodium and potassium adduct  $[M+Na]^+$  and  $[M+K]^+$ , respectively. **c)** Thermolysin digestion with single cleavage as the result lead to the hydrolysis of <sup>L</sup>G<sub>10</sub> variant, with the observed  $m/z$  2695.197, 2717.199 and 2733.194 as the hydrogen, sodium and potassium adduct  $[M+H_2O+H]^+$ ,  $[M+H_2O+Na]^+$  and  $[M+H_2O+K]^+$ , respectively.

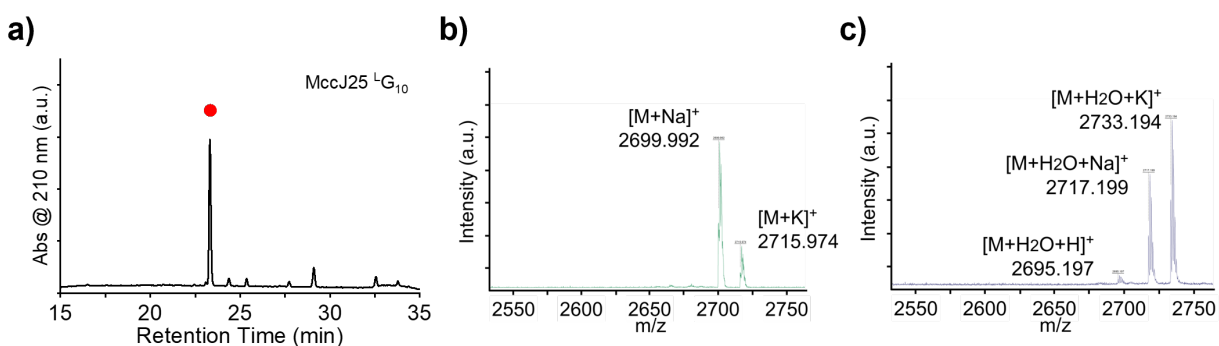

**Figure S10.** The HPLC analysis and MS confirmation of MccJ25 <sup>L</sup>G<sub>15</sub> variant

MccJ25 <sup>L</sup>G<sub>15</sub> variant. **a)** Crude extract was analyzed by HPLC with <sup>L</sup>G<sub>15</sub> variant eluted at  $t_R = 22.9$  min. **b)** The peak presumed to be <sup>L</sup>G<sub>15</sub> variant was collected and confirmed by MALDI-TOF MS with the observed  $m/z$  2962.345, 2984.305 and 3000.301 as the hydrogen, sodium and potassium adduct  $[M+H]^+$ ,  $[M+Na]^+$  and  $[M+K]^+$ , respectively. **c)** Thermolysin digestion with single cleavage as the result lead to the hydrolysis of <sup>L</sup>G<sub>15</sub> variant, with the observed  $m/z$  3002.322 and 3018.306 as the sodium and potassium adduct  $[M+H_2O+Na]^+$  and  $[M+H_2O+K]^+$ , respectively.

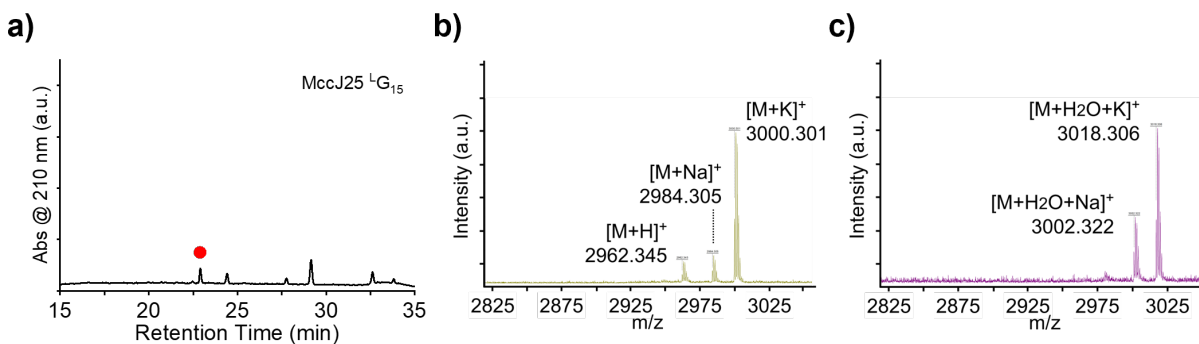

**Figure S11.** The HPLC analysis and MS confirmation of MccJ25 <sup>L</sup>A<sub>1</sub>A<sub>1</sub> variant

MccJ25 <sup>L</sup>A<sub>1</sub>A<sub>1</sub> variant. **a)** Crude extract was analyzed by HPLC with <sup>L</sup>A<sub>1</sub>A<sub>1</sub> variant eluted at  $t_R = 24.8$  min. **b)** The peak presumed to be <sup>L</sup>A<sub>1</sub>A<sub>1</sub> variant was collected and confirmed by MALDI-TOF MS with the observed  $m/z$  2271.678 and 2287.667 as the sodium and potassium adduct  $[M+Na]^+$  and  $[M+K]^+$ , respectively. **c)** Thermolysin digestion led to the loss of a tripeptide fragment “VAG”, resulting in a supramolecular complex, also known as a [2]rotaxane  $[(\underline{GGAHGVPEYF}) \bullet (\underline{IGTPAISFYG})]$ , with the observed  $m/z$  2040.335 and 2062.359 as the hydrogen and sodium adduct  $[M-VAG+H_2O+H]^+$  and  $[M-VAG+H_2O+Na]^+$ , respectively.

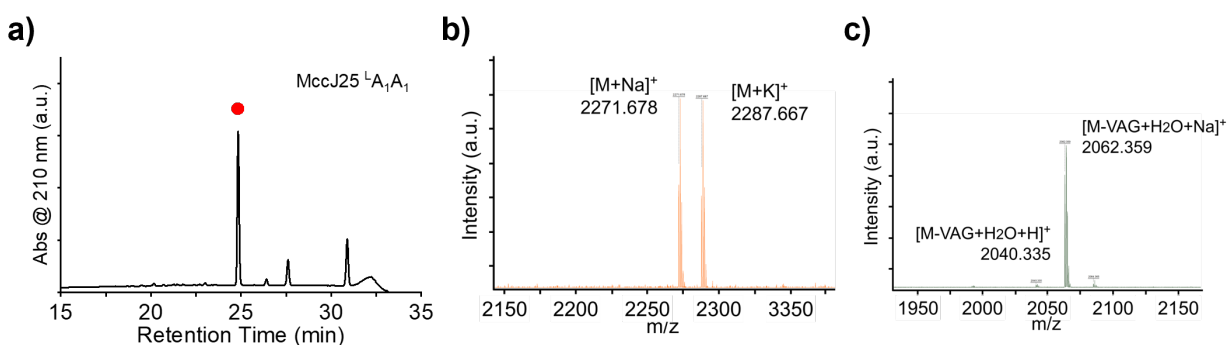

**Figure S12.** The HPLC analysis and MS confirmation of MccJ25 <sup>L</sup>ARA variant

MccJ25 <sup>L</sup>ARA variant. **a)** Crude extract was analyzed by HPLC with <sup>L</sup>ARA variant eluted at  $t_R = 23.3$  min. **b)** The peak presumed to be <sup>L</sup>ARA variant was collected and confirmed by MALDI-TOF MS with the observed  $m/z$  2405.550 and 2427.554 as the hydrogen and sodium adduct  $[M+H]^+$  and  $[M+Na]^+$ , respectively. **c)** Thermolysin digestion led to the loss of a pentapeptide fragment “VGARA”, resulting in a supramolecular complex, also known as a [2]rotaxane  $[(\underline{GGAHGVPEYF}) \bullet (\underline{IGTPISFYG})]$ , with the observed  $m/z$  1991.280 and 2007.293 as the sodium and potassium adduct  $[M-VGARA+H_2O+Na]^+$  and  $[M-VGARA+H_2O+K]^+$ , respectively.

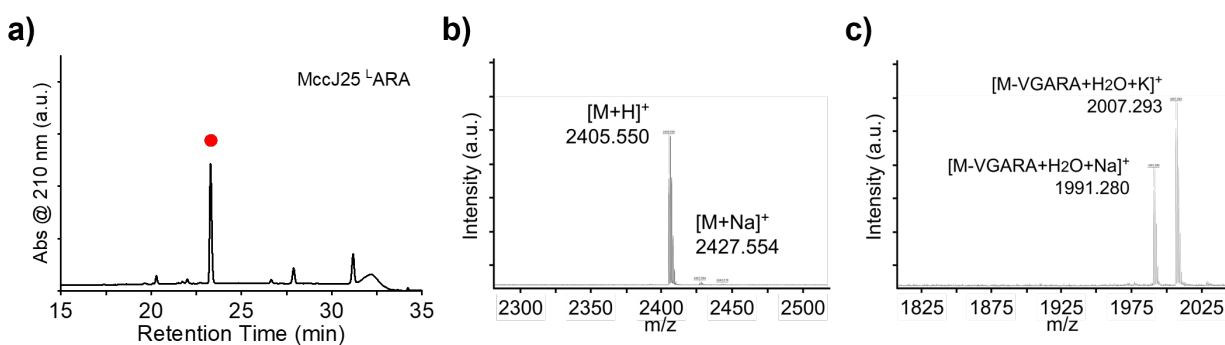

**Figure S13.** The HPLC analysis and MS confirmation of MccJ25 <sup>L</sup>SARAE variant

MccJ25 <sup>L</sup>SARAE variant. **a)** Crude extract was analyzed by HPLC with <sup>L</sup>SARAE variant eluted at  $t_R = 22.8$  min. **b)** The peak presumed to be <sup>L</sup>SARAE variant was collected and confirmed by MALDI-TOF MS with the observed  $m/z$  2621.640 and 2643.866 as the hydrogen and sodium adduct  $[M+H]^+$  and  $[M+Na]^+$ , respectively. **c)** Thermolysin digestion led to the loss of a heptapeptide fragment “VGSARAE”, resulting in a supramolecular complex, also known as a [2]rotaxane  $[(GGAHGVPEYF) \cdot (IGTPI SFYG)]$ , with the observed  $m/z$  1991.238 and 2007.237 as the sodium and potassium adduct  $[M-VGSARAE+H_2O+Na]^+$  and  $[M-VGSARAE+H_2O+K]^+$ , respectively.

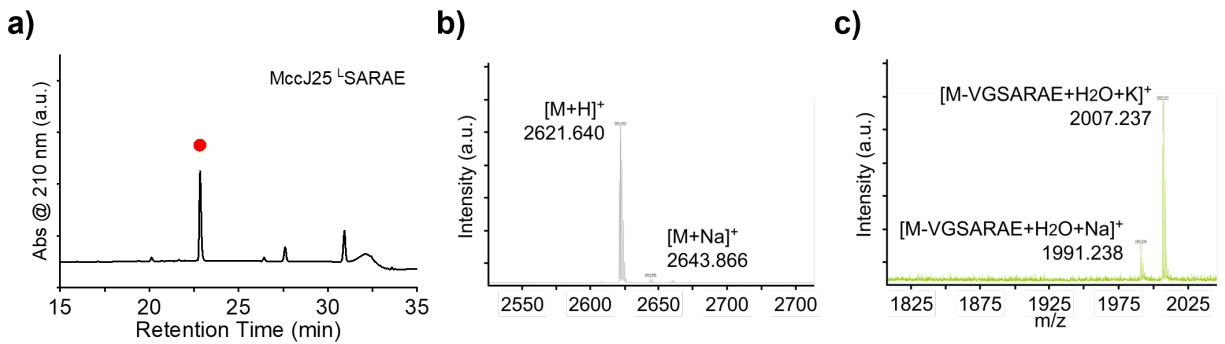

**Figure S14.** The HPLC analysis and MS confirmation of MccJ25  ${}^L\text{G}_2\text{S}_2\text{G}_2\text{S}_2\text{G}_2$  variant

MccJ25  ${}^L\text{G}_2\text{S}_2\text{G}_2\text{S}_2\text{G}_2$  variant. **a)** Crude extract was analyzed by HPLC with  ${}^L\text{G}_2\text{S}_2\text{G}_2\text{S}_2\text{G}_2$  variant eluted at  $t_R = 23.5$  min. **b)** The peak presumed to be  ${}^L\text{G}_2\text{S}_2\text{G}_2\text{S}_2\text{G}_2$  variant was collected and confirmed by MALDI-TOF MS with the observed  $m/z$  2819.724 and 2835.710 as the sodium and potassium adduct  $[\text{M}+\text{Na}]^+$  and  $[\text{M}+\text{K}]^+$ , respectively. **c)** Thermolysin digestion with single cleavage as the result lead to the hydrolysis of  ${}^L\text{G}_2\text{S}_2\text{G}_2\text{S}_2\text{G}_2$  variant, with the observed  $m/z$  2837.398 and 2853.382 as the sodium and potassium adduct  $[\text{M}+\text{H}_2\text{O}+\text{Na}]^+$  and  $[\text{M}+\text{H}_2\text{O}+\text{K}]^+$ , respectively.

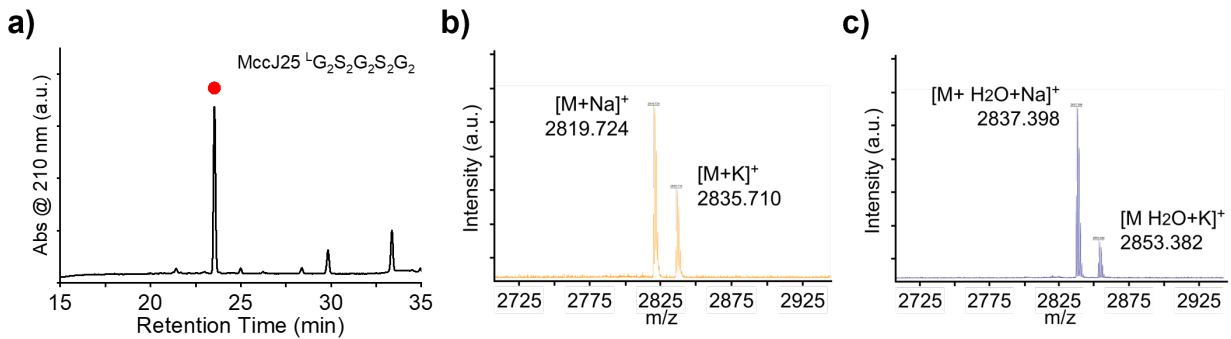

**Figure S15.** Lasso structure prediction for all MccJ25 variants

We used LassoPred to visualize the lasso structure of all tail- and loop-expansion variants,<sup>[9]</sup> an algorithm designed specifically for lasso peptides (<https://lassopred.accre.vanderbilt.edu/>). The predicted structure was presented after rendering by using the PyMOL Molecular Graphics System, v.3.1 (Schrödinger LLC, USA). The ring region of all variants was colored in limegreen, the isopeptide bond between Gly1 N-terminal amine and Glu8 side-chain carboxylate in orange, and the rest of the peptide in dark gray. The loop regions of all variants adopt a similar  $\beta$ -hairpin-like compact structure and their tails pass through the macrolactam ring. Amino acid insertions, i.e., the “expansions”, were shown in red.

**a)** MccJ25 <sup>T</sup>G<sub>1</sub> Variant

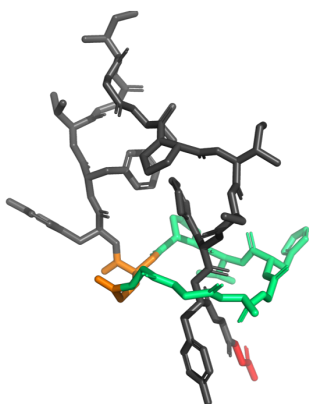

**b)** MccJ25 <sup>L</sup>A<sub>1</sub> Variant

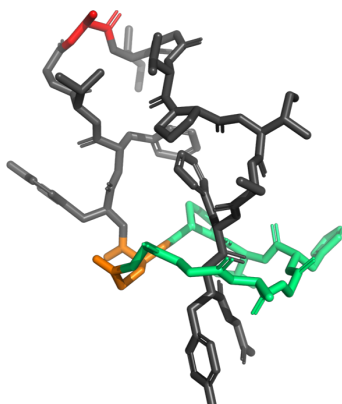

**c)** MccJ25 <sup>L</sup>A<sub>3</sub> Variant

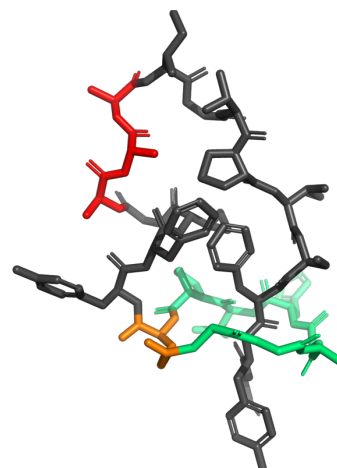

**d)** MccJ25 <sup>L</sup>A<sub>5</sub> Variant

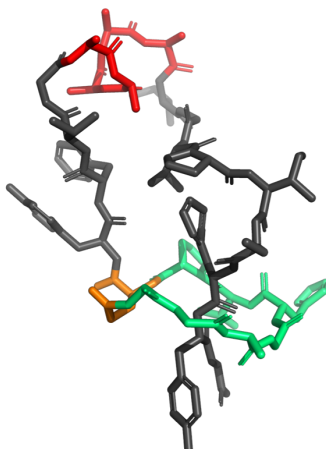

**e)** MccJ25 <sup>L</sup>A<sub>7</sub> Variant

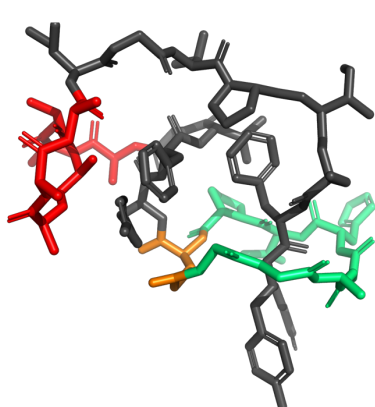

**f)** MccJ25 <sup>L</sup>A<sub>10</sub> Variant

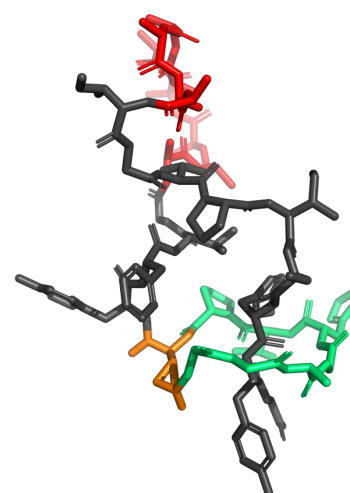

**g)** MccJ25 <sup>L</sup>G<sub>10</sub> Variant

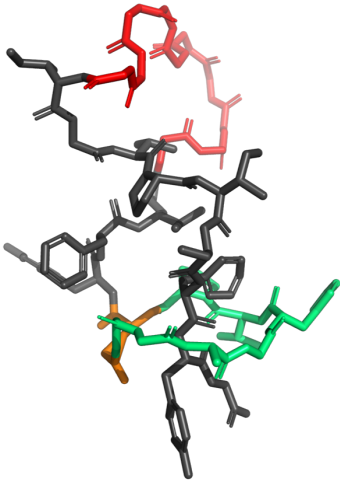

**h)** MccJ25 <sup>L</sup>G<sub>15</sub> Variant

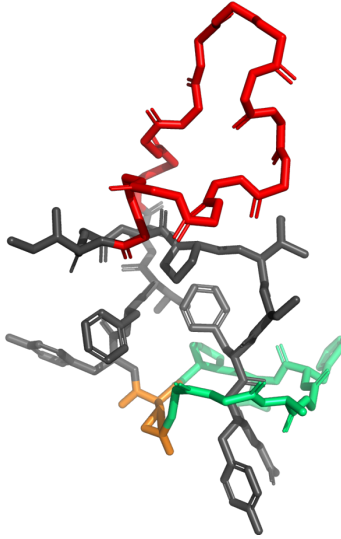

**i)** MccJ25 <sup>L</sup>A<sub>1</sub>A<sub>1</sub> variant

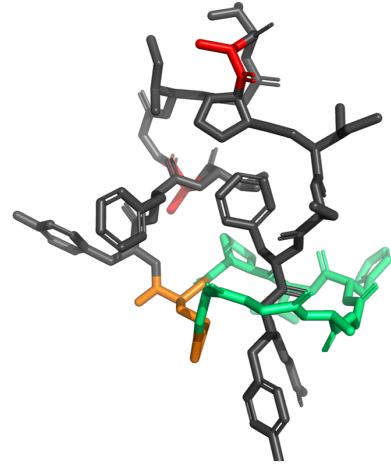

**j)** MccJ25 <sup>L</sup>ARA variant

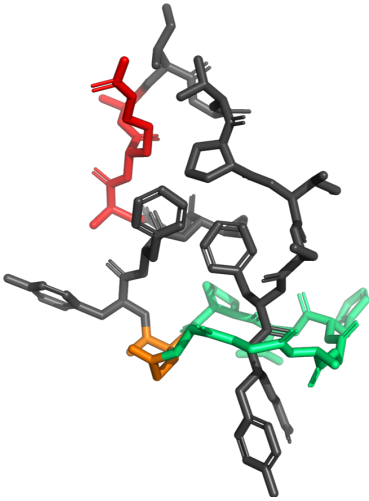

**k)** MccJ25 <sup>L</sup>SARAE variant

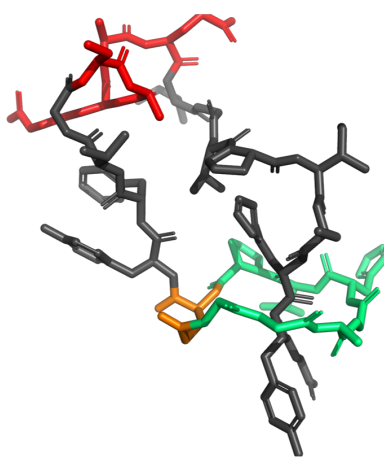

**l)** MccJ25 <sup>L</sup>G<sub>2</sub>S<sub>2</sub>G<sub>2</sub>S<sub>2</sub>G<sub>2</sub> variant

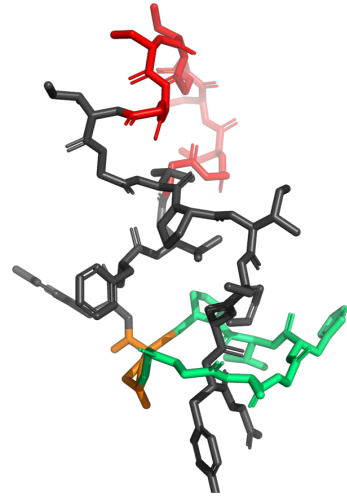

## SUPPLEMENTARY TABLEs

**Table S1.** DNA primers used in this study

| MccJ25                              | Name           | Sequence (5' to 3')                                  |
|-------------------------------------|----------------|------------------------------------------------------|
| <sup>R</sup> A <sub>1</sub>         | mcjA_+A3_F     | GCAGGACATGTGCCTGAGTATTTTG                            |
|                                     | mcjA_+A3_R     | CGCACCACCTTTTGTGAGTTGCG                              |
| <sup>T</sup> G <sub>1</sub>         | mcjA_+G22_F    | GGGTGATATTCTGAAAGAAGAAGAACTCTGTCATTTTGTGTC           |
|                                     | mcjA_+G22_R    | GCCATAGAAAGATATAGGTGTACCAATCCCC                      |
| <sup>L</sup> A <sub>1</sub>         | mcjA_+A13_F    | GCAATTGGTACACCTATATCTTTCTATGGCTGATATTC               |
|                                     | mcjA_+A13_R    | CCCCACAAAATACTCAGGCACATG                             |
| <sup>L</sup> A <sub>3</sub>         | mcjA_+A13_F    | GCAATTGGTACACCTATATCTTTCTATGGCTGATATTC               |
|                                     | mcjA_+AAA_R    | GGCCGCCCCCACAATACTCAGGCACATG                         |
| <sup>L</sup> A <sub>5</sub>         | mcjA_+A(5)_F   | GCTGCGGCAATTGGTACACCTATATCTTTCTATGGCTG               |
|                                     | mcjA_+AAA_R    | GGCCGCCCCCACAATACTCAGGCACATG                         |
| <sup>L</sup> A <sub>7</sub>         | mcjA_+A(7)_F   | GCGGCTGCAATTGGTACACCTATATCTTTCTATGGCTG               |
|                                     | mcjA_+A(7)_R   | GGCTGCAGCTGCCCCCACAATACTCAGGCACATG                   |
| <sup>L</sup> A <sub>10</sub>        | mcjA_+A(10)_F  | GCTGCTGCGGCCGCGATTGGTACACCTATATCTTTCTATGGCTGA        |
|                                     | mcjA_+A(10)_R  | GGCTGCAGCAGCGGCCCCCAAAAATACTCAGGCACATG               |
| <sup>L</sup> G <sub>10</sub>        | mcjA_+G(10)_F  | GTGGTGGAGGCGGGATTGGTACACCTATATCTTTCTATGGCTGA         |
|                                     | mcjA_+G(10)_R  | CTCCTCCCCCGCCGCCCCCAAAAATACTCAGGCACATG               |
| <sup>L</sup> G <sub>15</sub>        | mcjA_+G(15)_F  | GAGGCGGGGAGGTGGTGGCGGCATTGGTACACCTATATCTTTCTATGGCTGA |
|                                     | mcjA_+G(15)_R  | CACCACCTCCTCCCCCGCCGCCCCCAAAAATACTCAGGCACATG         |
| <sup>L</sup> A <sub>1A1</sub>       | mcjA_A12A17_F  | GGTACAGCTCCTATATCTTTCTATGGCTG                        |
|                                     | mcjA_A12A17_R  | AATCCCGGCCACAATACTCAGG                               |
| <sup>L</sup> ARA                    | mcjA_+A13_F    | GCAATTGGTACACCTATATCTTTCTATGGCTGATATTC               |
|                                     | mcjA_+ARA_R    | CCTTGCCCCCACAATACTCAGGCACATG                         |
| <sup>L</sup> SARAE                  | mcjA_+SARAE_F  | GCAGAGATTGGTACACCTATATCTTTCTATGGCTG                  |
|                                     | mcjA_+SARAE_R  | CCTTGCTGACCCCAAAAATACTCAGGCAC                        |
| <sup>L</sup> G <sub>2S2G2S2G2</sub> | mcjA_+GS(10)_F | GTTCTTCTGCGGGATTGGTACACCTATATCTTTCTATGGCTGA          |
|                                     | mcjA_+GS(10)_R | CTCCACTACTGCCGCCCCCAAAAATACTCAGGCACATG               |

**Table S2.** Fragmentation series of MccJ25 <sup>L</sup>G<sub>15</sub> variant

MS<sup>2</sup> analysis of m/z 994.11 from Figure 2e, peptide sequences corresponding to the fragment ions are highlighted in bold.

|                                                        | ion | charge | [M+H] <sup>+</sup><br>calc. | [M+H] <sup>+</sup> obs. |
|--------------------------------------------------------|-----|--------|-----------------------------|-------------------------|
| <b>C-terminal y-series</b>                             |     |        |                             |                         |
| GGAHGVPEY <b>FVGGGGGGGGGGGGGGGGGGIGTPISFYG</b>         | y28 | 2+     | 1138.5147                   | 1138.9820               |
| GGAHGVPEYFVGGGG <b>GGGGGGGGGGGGGGGGGGIGTPISFYG</b>     | y22 | 1+     | 1695.7725                   | 1695.6028               |
| GGAHGVPEYFVGGGGGG <b>GGGGGGGGGGGGGGGGGGIGTPISFYG</b>   | y20 | 1+     | 1581.7295                   | 1581.6134               |
| GGAHGVPEYFVGGGGGGGG <b>GGGGGGGGGGGGGGGGGGIGTPISFYG</b> | y19 | 1+     | 1524.7081                   | 1524.2094               |
| GGAHGVPEYFVGGGGGGGG <b>GGGGGGGGGGGGGGGGGGIGTPISFYG</b> | y18 | 1+     | 1467.6866                   | 1467.9879               |
| GGAHGVPEYFVGGGGGGGG <b>GGGGGGGGGGGGGGGGGGIGTPISFYG</b> | y17 | 1+     | 1410.6651                   | 1410.9384               |
| GGAHGVPEYFVGGGGGGGG <b>GGGGGGGGGGGGGGGGGGIGTPISFYG</b> | y16 | 1+     | 1353.6437                   | 1353.6412               |
| GGAHGVPEYFVGGGGGGGG <b>GGGGGGGGGGGGGGGGGGIGTPISFYG</b> | y15 | 1+     | 1296.6222                   | 1296.5852               |
| GGAHGVPEYFVGGGGGGGG <b>GGGGGGGGGGGGGGGGGGIGTPISFYG</b> | y13 | 1+     | 1182.5793                   | 1182.4979               |
| GGAHGVPEYFVGGGGGGGG <b>GGGGGGGGGGGGGGGGGGIGTPISFYG</b> | y12 | 1+     | 1125.5578                   | 1125.4789               |
| GGAHGVPEYFVGGGGGGGG <b>GGGGGGGGGGGGGGGGGGIGTPISFYG</b> | y11 | 1+     | 1068.5364                   | 1068.4590               |
| GGAHGVPEYFVGGGGGGGG <b>GGGGGGGGGGGGGGGGGGIGTPISFYG</b> | y9  | 1+     | 954.4934                    | 954.6899                |
| GGAHGVPEYFVGGGGGGGG <b>GGGGGGGGGGGGGGGGGGIGTPISFYG</b> | y8  | 1+     | 841.4094                    | 841.3467                |
| GGAHGVPEYFVGGGGGGGG <b>GGGGGGGGGGGGGGGGGGIGTPISFYG</b> | y7  | 1+     | 784.3879                    | 784.3349                |
| GGAHGVPEYFVGGGGGGGG <b>GGGGGGGGGGGGGGGGGGIGTPISFYG</b> | y6  | 1+     | 683.2402                    | 683.3266                |
| GGAHGVPEYFVGGGGGGGG <b>GGGGGGGGGGGGGGGGGGIGTPISFYG</b> | y5  | 1+     | 586.2875                    | 586.2806                |
| GGAHGVPEYFVGGGGGGGG <b>GGGGGGGGGGGGGGGGGGIGTPISFYG</b> | y4  | 1+     | 473.2034                    | 473.1899                |
| GGAHGVPEYFVGGGGGGGG <b>GGGGGGGGGGGGGGGGGGIGTPISFYG</b> | y3  | 1+     | 386.1714                    | 386.1682                |
| GGAHGVPEYFVGGGGGGGG <b>GGGGGGGGGGGGGGGGGGIGTPISFYG</b> | y2  | 1+     | 239.1030                    | 239.0999                |
| <b>N-terminal b-series</b>                             |     |        |                             |                         |
| <b>GGAHGVPEY</b> FVGGGGGGGGGGGGGGGGGGIGTPISFYG         | b8  | 1+     | 687.3318                    | 687.3102                |
| <b>GGAHGVPEY</b> FVGGGGGGGGGGGGGGGGGGIGTPISFYG         | b9  | 1+     | 850.3875                    | 850.1786                |
| <b>GGAHGVPEYF</b> VGGGGGGGGGGGGGGGGGGIGTPISFYG         | b10 | 1+     | 997.4635                    | 997.4217                |
| <b>GGAHGVPEYFV</b> GGGGGGGGGGGGGGGGGGIGTPISFYG         | b11 | 1+     | 1096.5243                   | 1096.4852               |
| <b>GGAHGVPEYFVG</b> GGGGGGGGGGGGGGGGGGIGTPISFYG        | b12 | 1+     | 1153.6468                   | 1153.4940               |
| <b>GGAHGVPEYFVGG</b> GGGGGGGGGGGGGGGGGGIGTPISFYG       | b13 | 1+     | 1210.5673                   | 1210.6631               |
| <b>GGAHGVPEYFVGGG</b> GGGGGGGGGGGGGGGGGGIGTPISFYG      | b14 | 1+     | 1267.5887                   | 1267.5243               |
| <b>GGAHGVPEYFVGGGG</b> GGGGGGGGGGGGGGGGGGIGTPISFYG     | b15 | 1+     | 1324.6102                   | 1324.5673               |
| <b>GGAHGVPEYFVGGGGG</b> GGGGGGGGGGGGGGGGGGIGTPISFYG    | b16 | 1+     | 1381.6317                   | 1381.2921               |

|                                               |     |    |           |           |
|-----------------------------------------------|-----|----|-----------|-----------|
| <u>GGAHGVPEYFVGGGGGGGGGGGGGGGGGGIGTPISFYG</u> | b17 | 2+ | 719.8266  | 719.8044  |
| <u>GGAHGVPEYFVGGGGGGGGGGGGGGGGGGIGTPISFYG</u> | b18 | 1+ | 1495.6746 | 1495.7456 |
| <u>GGAHGVPEYFVGGGGGGGGGGGGGGGGGGIGTPISFYG</u> | b19 | 1+ | 1552.6961 | 1552.0441 |
| <u>GGAHGVPEYFVGGGGGGGGGGGGGGGGGGIGTPISFYG</u> | b21 | 2+ | 833.8695  | 833.4049  |
| <u>GGAHGVPEYFVGGGGGGGGGGGGGGGGGGIGTPISFYG</u> | b24 | 2+ | 919.4017  | 919.9049  |
| <u>GGAHGVPEYFVGGGGGGGGGGGGGGGGGGIGTPISFYG</u> | b29 | 2+ | 1089.9867 | 1089.9494 |
| <u>GGAHGVPEYFVGGGGGGGGGGGGGGGGGGIGTPISFYG</u> | b30 | 2+ | 1140.5105 | 1140.4925 |
| <u>GGAHGVPEYFVGGGGGGGGGGGGGGGGGGIGTPISFYG</u> | b31 | 3+ | 793.0322  | 793.3274  |
| <u>GGAHGVPEYFVGGGGGGGGGGGGGGGGGGIGTPISFYG</u> | b32 | 3+ | 830.7269  | 830.6906  |

**Sterically linked by y-series**

|                                                                         |        |    |           |           |
|-------------------------------------------------------------------------|--------|----|-----------|-----------|
| <u>GGAHGVPE(YF)VGGGGGGGGGGGGGGGGGGIGTPISFYG</u>                         | b8+y26 | 3+ | 884.7406  | 884.9957  |
| <u>GGAHGVPE(YFV)GGGGGGGGGGGGGGGGGGIGTPISFYG</u>                         | b8+y25 | 3+ | 851.7178  | 851.6890  |
| <u>GGAHGVPE(YFVGG)GGGGGGGGGGGGGGGGGGIGTPISFYG</u>                       | b8+y23 | 3+ | 813.7035  | 813.0065  |
| <u>GGAHGVPE(YFVGGG)GGGGGGGGGGGGGGGGGGIGTPISFYG</u>                      | b8+y22 | 3+ | 794.6964  | 794.6284  |
| <u>GGAHGVPE(YFVGGGGG)GGGGGGGGGGGGGGGGGGIGTPISFYG</u>                    | b8+y19 | 3+ | 737.6749  | 737.9854  |
| <u>GGAHGVPE(YFVGGGGGGG)GGGGGGGGGGGGGGGGGGIGTPISFYG</u>                  | b8+y17 | 3+ | 699.6606  | 699.4940  |
| <u>GGAHGVPE(YFVGGGGGGGGG)GGGGGGGGGGGGGGGGGGIGTPISFYG</u>                | b8+y16 | 3+ | 680.6534  | 680.4859  |
| <u>GGAHGVPE(YFVGGGGGGGGGGG)GGGGGGGGGGGGGGGGGGIGTPISFYG</u>              | b8+y15 | 2+ | 991.9694  | 991.5682  |
| <u>GGAHGVPE(YFVGGGGGGGGGGGGG)GGGGGGGGGGGGGGGGGGIGTPISFYG</u>            | b8+y13 | 2+ | 934.9480  | 934.6476  |
| <u>GGAHGVPE(YFVGGGGGGGGGGGGGGG)GGGGGGGGGGGGGGGGGGIGTPISFYG</u>          | b8+y11 | 2+ | 877.9265  | 877.3660  |
| <u>GGAHGVPE(YFVGGGGGGGGGGGGGGGG)GGGGGGGGGGGGGGGGGGIGTPISFYG</u>         | b8+y10 | 2+ | 849.4158  | 849.8871  |
| <u>GGAHGVPE(YFVGGGGGGGGGGGGGGGGGG)GGGGGGGGGGGGGGGGGGIGTPISFYG</u>       | b8+y9  | 1+ | 1697.8315 | 1697.8713 |
| <u>GGAHGVPE(YFVGGGGGGGGGGGGGGGGGGGG)GGGGGGGGGGGGGGGGGGIGTPISFYG</u>     | b8+y8  | 1+ | 1527.7260 | 1527.6676 |
| <u>GGAHGVPE(YFVGGGGGGGGGGGGGGGGGGGGG)GGGGGGGGGGGGGGGGGGIGTPISFYG</u>    | b8+y7  | 2+ | 735.8523  | 735.8329  |
| <u>GGAHGVPE(YFVGGGGGGGGGGGGGGGGGGGGGG)GGGGGGGGGGGGGGGGGGIGTPISFYG</u>   | b8+y6  | 1+ | 1369.5568 | 1369.6429 |
| <u>GGAHGVPE(YFVGGGGGGGGGGGGGGGGGGGGGGG)GGGGGGGGGGGGGGGGGGIGTPISFYG</u>  | b8+y5  | 1+ | 1272.6041 | 1272.5318 |
| <u>GGAHGVPE(YFVGGGGGGGGGGGGGGGGGGGGGGGG)GGGGGGGGGGGGGGGGGGIGTPISFYG</u> | b8+y4  | 1+ | 1159.5200 | 1159.4993 |
| <u>GGAHGVPEY(FV)GGGGGGGGGGGGGGGGGGGGIGTPISFYG</u>                       | b9+y25 | 3+ | 906.0723  | 906.0188  |
| <u>GGAHGVPEY(FVGG)GGGGGGGGGGGGGGGGGGGGIGTPISFYG</u>                     | b9+y23 | 3+ | 868.0579  | 868.5702  |
| <u>GGAHGVPEY(FVGGG)GGGGGGGGGGGGGGGGGGGGIGTPISFYG</u>                    | b9+y21 | 3+ | 830.0436  | 830.3635  |
| <u>GGAHGVPEY(FVGGGGG)GGGGGGGGGGGGGGGGGGGGIGTPISFYG</u>                  | b9+y19 | 3+ | 792.0293  | 792.9862  |
| <u>GGAHGVPEY(FVGGGGGGG)GGGGGGGGGGGGGGGGGGGGIGTPISFYG</u>                | b9+y18 | 3+ | 773.0222  | 773.6485  |
| <u>GGAHGVPEY(FVGGGGGGGGG)GGGGGGGGGGGGGGGGGGGGIGTPISFYG</u>              | b9+y16 | 3+ | 735.0079  | 735.0003  |
| <u>GGAHGVPEY(FVGGGGGGGGGGG)GGGGGGGGGGGGGGGGGGGGIGTPISFYG</u>            | b9+y15 | 2+ | 1073.5010 | 1073.9351 |
| <u>GGAHGVPEY(FVGGGGGGGGGGGGG)GGGGGGGGGGGGGGGGGGGGIGTPISFYG</u>          | b9+y14 | 3+ | 696.9936  | 696.1173  |

|                                                             |         |    |           |           |
|-------------------------------------------------------------|---------|----|-----------|-----------|
| <b><u>GGAHGVPEY(FVGGGGGGGGGGGGGGGGI)GTPISFYG</u></b>        | b9+y8   | 2+ | 845.8947  | 845.9002  |
| <b><u>GGAHGVPEY(FVGGGGGGGGGGGGGGGGIGT)PISFYG</u></b>        | b9+y6   | 1+ | 1532.6201 | 1532.6168 |
| <b><u>GGAHGVPEY(FVGGGGGGGGGGGGGGGGIGTP)ISFYG</u></b>        | b9+y5   | 1+ | 1435.6674 | 1435.6002 |
| <b><u>GGAHGVPEY(FVGGGGGGGGGGGGGGGGIGTPI)SFYG</u></b>        | b9+y4   | 1+ | 1322.5833 | 1322.5402 |
| <b><u>GGAHGVPEYF(VGG)GGGGGGGGGGGGGGIGTPIISFYG</u></b>       | b10+y23 | 3+ | 917.0807  | 917.7498  |
| <b><u>GGAHGVPEYF(VGGGG)GGGGGGGGGGGGGGIGTPIISFYG</u></b>     | b10+y21 | 3+ | 879.0664  | 879.0642  |
| <b><u>GGAHGVPEYF(VGGGGGGGGGGGGGGGGGG)GGGGIGTPIISFYG</u></b> | b10+y13 | 2+ | 1090.0140 | 1090.4257 |
| <b><u>GGAHGVPEYF(VGGGGGGGGGGGGGGGGGGI)GTPISFYG</u></b>      | b10+y8  | 2+ | 919.4289  | 919.2049  |
| <b><u>GGAHGVPEYF(VGGGGGGGGGGGGGGGGGGIGT)PISFYG</u></b>      | b10+y6  | 1+ | 1679.6885 | 1679.7903 |
| <b><u>GGAHGVPEYF(VGGGGGGGGGGGGGGGGGGIGTP)ISFYG</u></b>      | b10+y5  | 1+ | 1582.7358 | 1582.6563 |
| <b><u>GGAHGVPEYF(VGGGGGGGGGGGGGGGGGGIGTPI)SFYG</u></b>      | b10+y4  | 2+ | 735.3259  | 735.3261  |

## REFERENCES

- [1] Solbiati JO, Ciaccio M, Farías RN, Salomón RA. Genetic analysis of plasmid determinants for microcin J25 production and immunity. *J Bacteriol.*, **1996**, 178
- [2] P. H. Chen, L. K. Sung, J. D. Hegemann, J. Chu. Disrupting transcription and folate biosynthesis leads to synergistic suppression of *Escherichia coli* growth. *ChemMedChem* **2022**, 17, e202200075
- [3] Tan, H. N.; Liu, W. Q.; Ho, J.; Chen, Y. J.; Shieh, F. J.; Liao, H. T.; Wang, S. P.; Hegemann, J. D.; Chang, C. Y.; Chu, J. Structure prediction and protein engineering yield new insights into microcin J25 precursor recognition. *ACS Chem Biol.* **2024**, 43, 4696-702
- [4] Abramson, J., Adler, J., Dunger, J. et al. Accurate structure prediction of biomolecular interactions with AlphaFold 3. *Nature* **2024**, 630, 493–500.
- [5] AlphaFold server. <https://alphafoldserver.com/> (accessed March 13, 2026)
- [6] Ye, B.; Tian, W.; Wang, B.; Liang, J. CASTpFold: Computed Atlas of Surface Topography of the universe of protein Folds, *Nucleic Acids Research*, **2024**, 52, W1, 194–199
- [7] CASTpFold server. <https://cfold.bme.uic.edu/castpfold/compute> (accessed March 13, 2026)
- [8] Ducasse, R.; Yan, K. P.; Goulard, C.; Blond, A.; Li, Y.; Lescop, E.; Guittet, E.; Rebuffat, S.; Zirah, S.; Sequence determinants governing the topology and biological activity of a lasso peptide, microcin J25. *ChemBioChem* **2012**, 13, 371-80
- [9] Ouyang, X., Ran, X., Xu, H. *et al.* LassoPred: a tool to predict the 3D structure of lasso peptides. *Nat Commun* **2025**, 16, 5497
